# Supplementary material for: Towards standardized microbial hydrogen consumption testing in the subsurface: Harmonized field sampling and enrichment approaches
Source: Research Square preprint supplement (doi:10.21203/rs.3.rs-6876738/v1), 2025-06-16
Supplement: Supplementary file 4 [file f7a572847a9f8fd7e2e31c2f.docx]

**Towards standardized microbial hydrogen consumption testing in the subsurface: Harmonized field sampling and enrichment approaches**

Kateřina Černá1*, Kristýna Fadrhonc1, Jakub Říha1, Petra Bombach2, Sylvain Stephant3, Caroline Michel3, Laura Fablet3, Joachim Tremosa4, Kyle Mayers5, Biwen Annie An-Stepec5, Nicole Dopffel5

1 Technical University of Liberec, Institute for Nanomaterials, Advanced Technologies and Innovation, Bendlova 7, 46117 Liberec, Czechia

2 Isodetect GmbH, Deutscher Platz 5b, 04103 Leipzig, Germany

3 BRGM, 3 Avenue Claude Guillemin, 45060 Orléans Cedex 2, France

4 Geostock, 2 Rue des Martinets, 92500 Rueil-Malmaison, France

5 Norwegian Research Centre AS – NORCE, Nygårdsgaten 112, 5008 Bergen, Norway

*Corresponding author: Kateřina Černá, [katerina.cerna1@tul.cz](mailto:katerina.cerna1@tul.cz), ORCID ID: 0000-0003-3351-6372


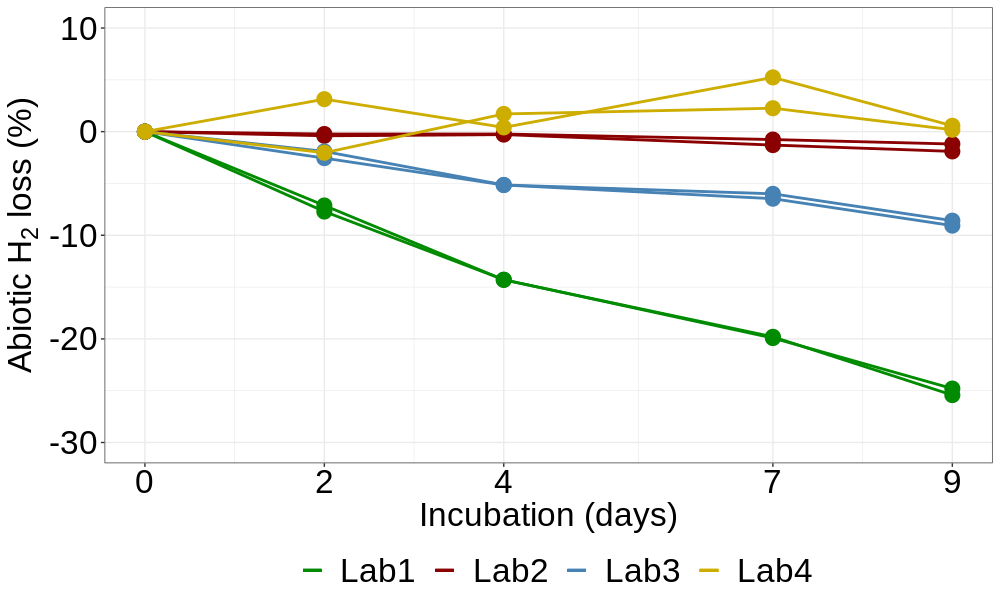


Supplementary Figure S1: Differences in abiotic H2 loss (in %) among laboratories.


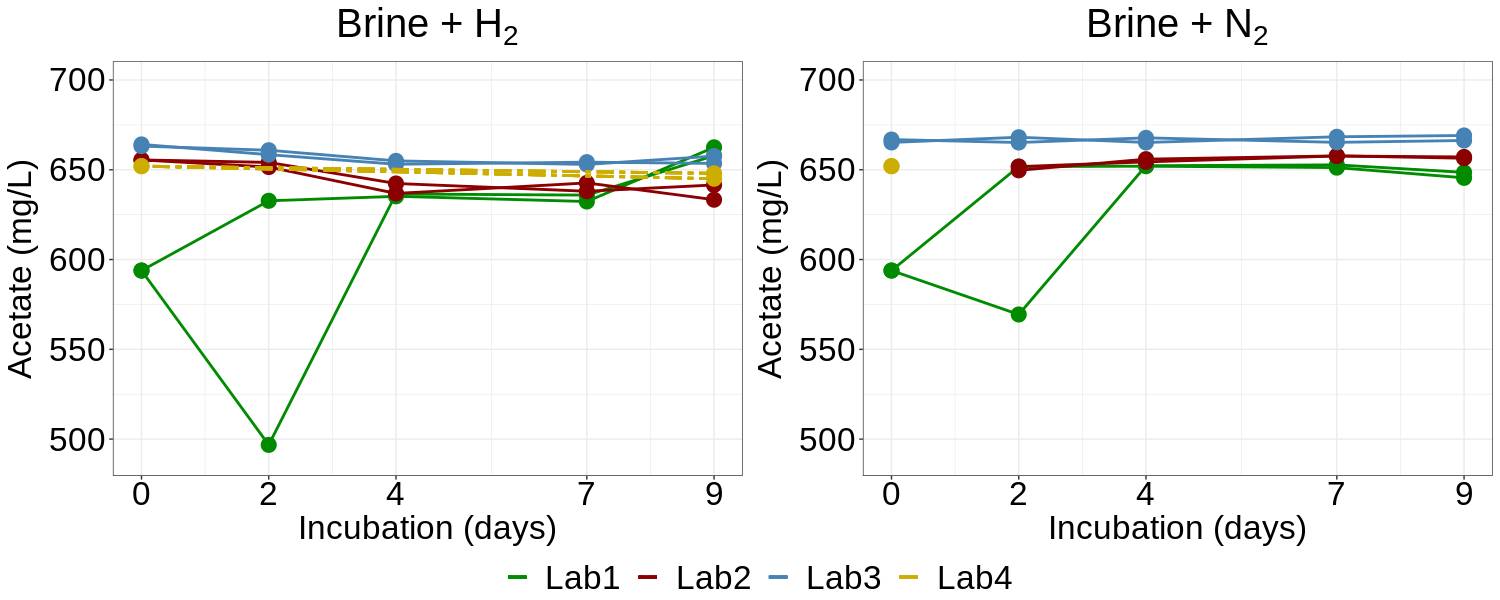
Supplementary Figure S2: Acetate concentration (mg/L) in brine samples incubated with hydrogen (left) and nitrogen (right) during the experiment in respective laboratories.


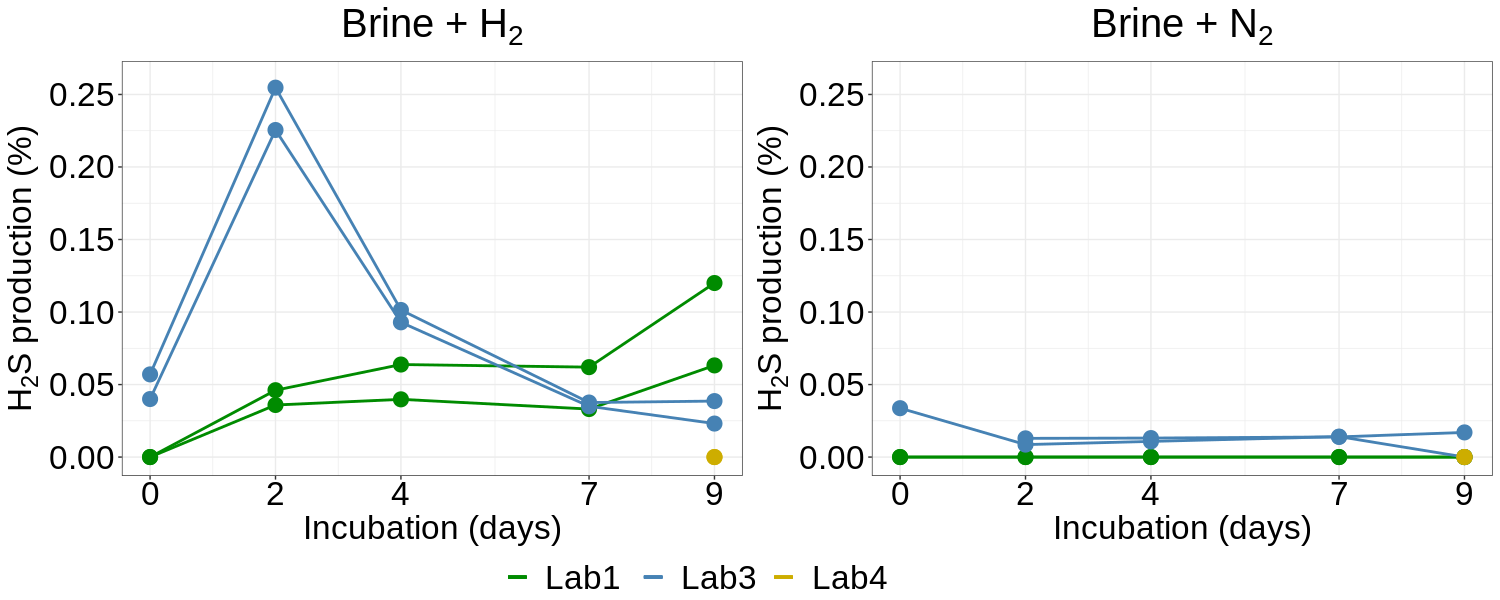

Supplementary Figure S3: Production of H2S (in %) in brine samples incubated with hydrogen (left) and nitrogen (right) during the experiment in respective laboratories.


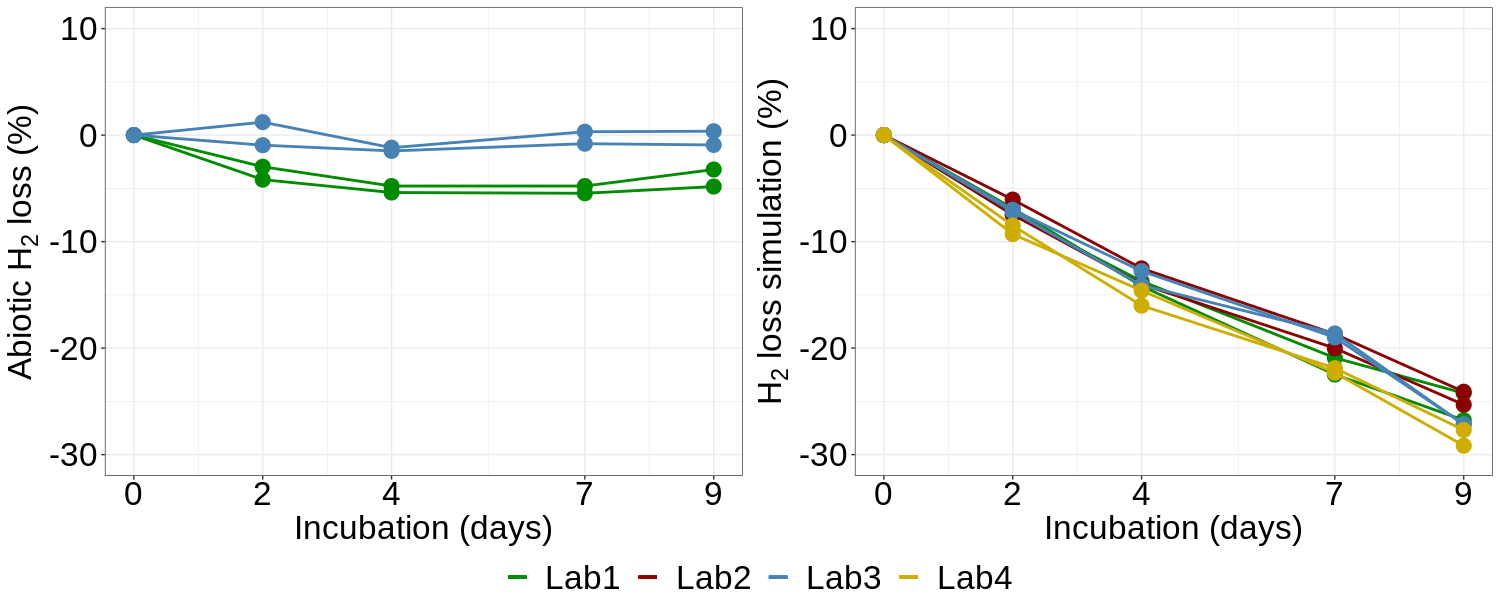


Supplementary Figure S4: Left: Abiotic H2 loss in Lab 1 and 4 after protocol optimization. Right: Simulation of microbial H2 consumption (in %) demonstrating consistency in hydrogen loss detection among the labs.
